# Supplementary material
Source: PubMed Central journal article supplement (PMC3798035)
Supplement: NIHMS516388-supplement-1.pdf [file NIHMS516388-supplement-1.pdf]

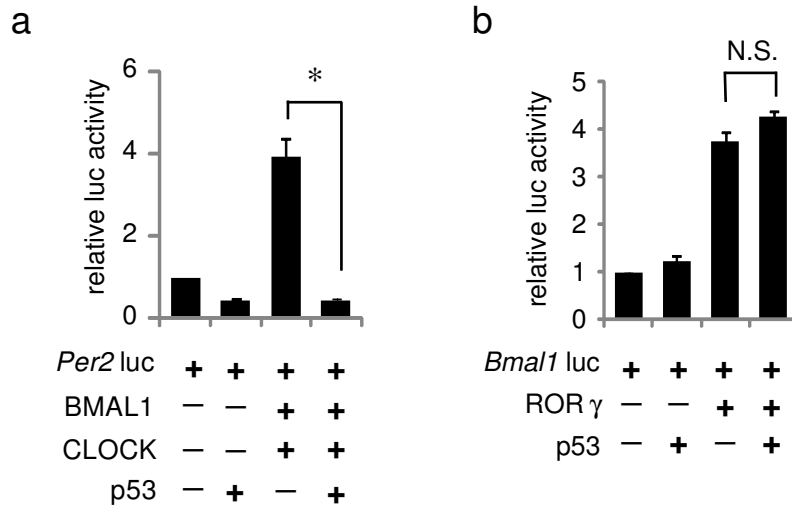

**Supplementary Figure S1.** p53 effects on the *mPer2* and *mBmal1* promoter in HeLa cells. (a) *Per2* or (b) *Bmal1* promoter luciferase reporter assays were performed in HeLa cells transfected with the indicated expression vectors. Cells were harvested 24 h after transfection. n>3. Error bars are mean  $\pm$  SEM. t-test: \*p< 0.05 N.S., not significant.

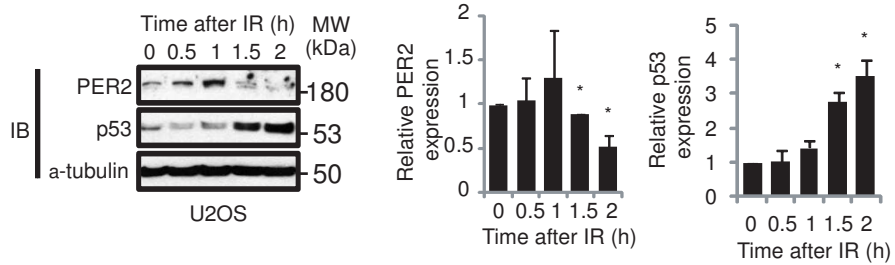

**Supplementary Figure S2.** Down-regulation of PER2 in U2OS cells after irradiation. U2OS cells were treated with  $\gamma$ -irradiation (10Gy) and cell lysates were analyzed by immunoblotting using indicated antibodies. Quantification is shown on the right (n=3). Error bars; mean  $\pm$  SEM. t-test: \*p< 0.05.

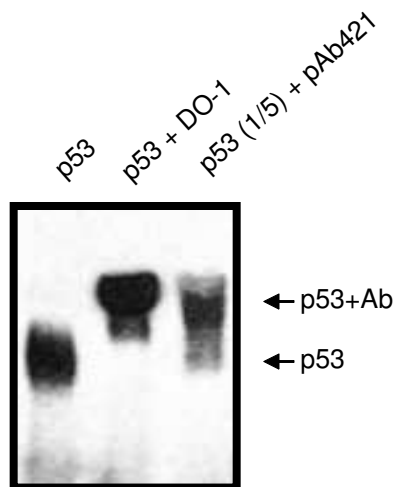

**Supplementary Figure S3.** Supershift of p53 containing band in EMSA. p53 binding to the *Per2* promoter consensus region is examined by EMSA. Two independent anti-p53 antibodies (DO-1 or pAb421) show supershift of the band.

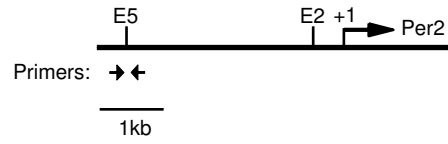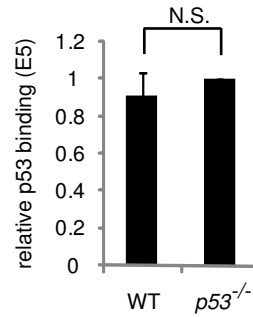

**Supplementary Figure S4.** p53 binding on *mPer2* promoter (E5).

CHIP assay performed for the *Per2* promoter E5 region using p53 antibody and extracts from WT and *p53*<sup>-/-</sup> MEF cells. Specific primers for E5 were used for qPCR analysis. The signal obtained from *p53*<sup>-/-</sup> MEF cells was set to 1.0. n=2, t-test: N.S., Not Significant.

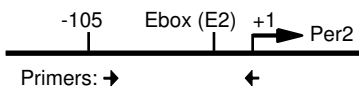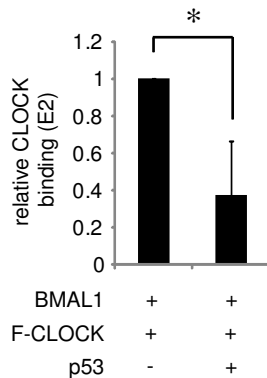

**Supplementary Figure S5.** CLOCK/BMAL1 binding on *Per2* promoter was modulated by p53 expression. CLOCK/BMAL1 binding to the *Per2* promoter examined by ChIP in the presence or absence of p53. *p53*<sup>-/-</sup> MEF cells were transfected with the indicated protein expression vectors and CHIP assay was performed using an anti-FLAG antibody. Primers for the E2 E-box region were used for qPCR analysis. *p53*<sup>-/-</sup> MEF cells transfected with BMAL1/FLAG-CLOCK was set to 1.0. Error bar: mean  $\pm$  SEM. t-test: \* $p$  < 0.05.

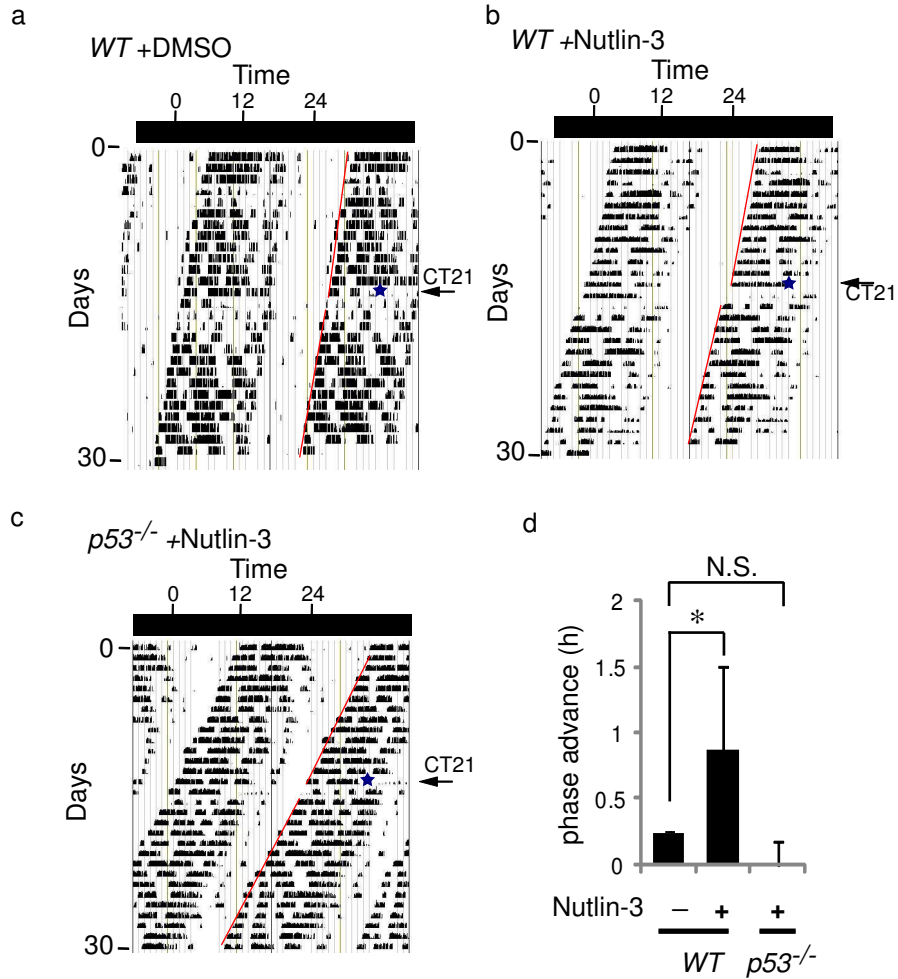

**Supplementary Figure S6.** Effect of Nutlin-3 injection on phase shift. Actograms show double plotted wheel-running activity. *Wild type* (a, b) or  $p53^{-/-}$  mice (c) were kept in a DD cycle for 2 weeks and one injection of Vehicle (DMSO) or Nutlin-3 was given at CT21. (d) Quantification of phase advance is performed ( $n > 2$ ). Error bars are mean  $\pm$  SEM. t-test: N.S., not Significant. \* $p < 0.05$

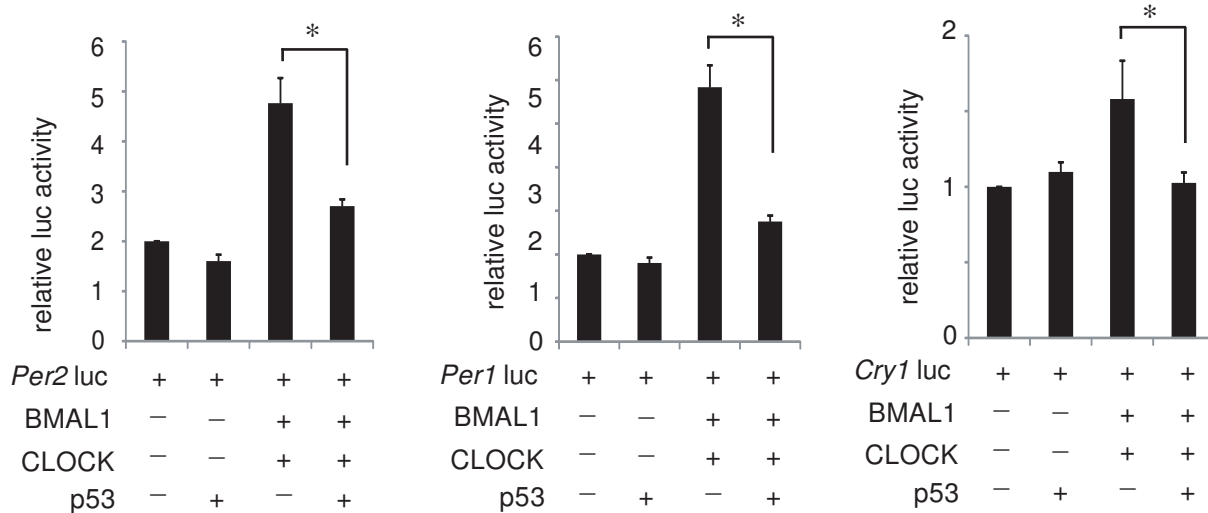

**Supplementary Figure S7.** Effect of p53 expression on *mPer2*, *mPer1* and *mCry1* promoter. *mPer2*, *mPer1* or *mCry1* promoter luciferase reporter assays were performed in Wildtype MEF cells transfected with the indicated expression vectors. Cells were harvested 24 h after transfection. Error bars are mean SEM. t-test: \* $p < 0.05$

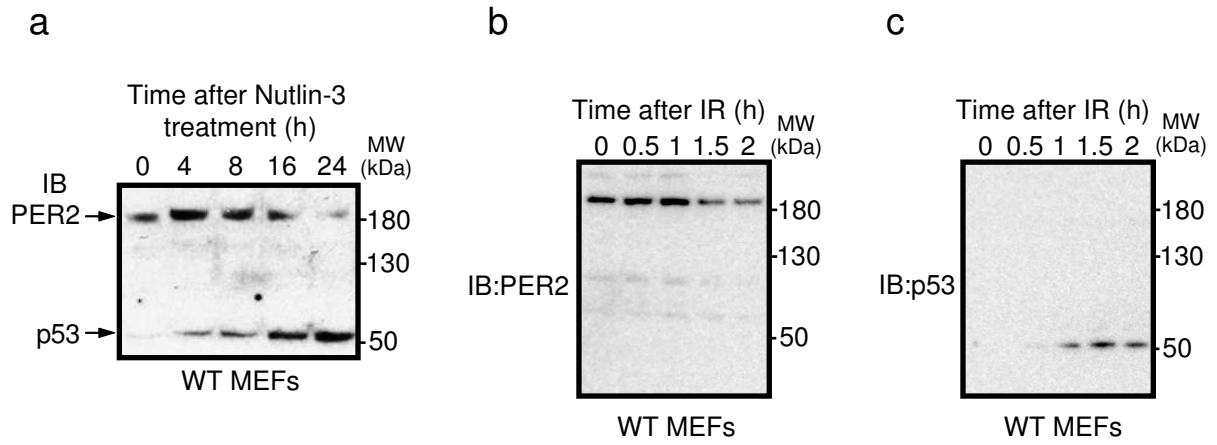

**Supplementary Figure S8.** Full-length images of immunoblots. (a) Full length image of Figure 1d. Immunoblotting was performed with an anti-mPer2 and an anti-p53 antibody. (b), (c) Full-length images of Figure 1h. Immunoblotting was performed with an anti-mPER2 (b) or an anti-p53 antibody (c).
